# Supplementary material for: Redox behavior of tumor-inhibiting ruthenium(iii) complexes and effects of physiological reductants on their binding to GMP
Source: Royal Society of Chemistry journal article supplement (doi:10.1039/b511792e), 2006-01-01

## NMR spectra for the reaction of KP1019 with GSH (1 : 5)

KP1019

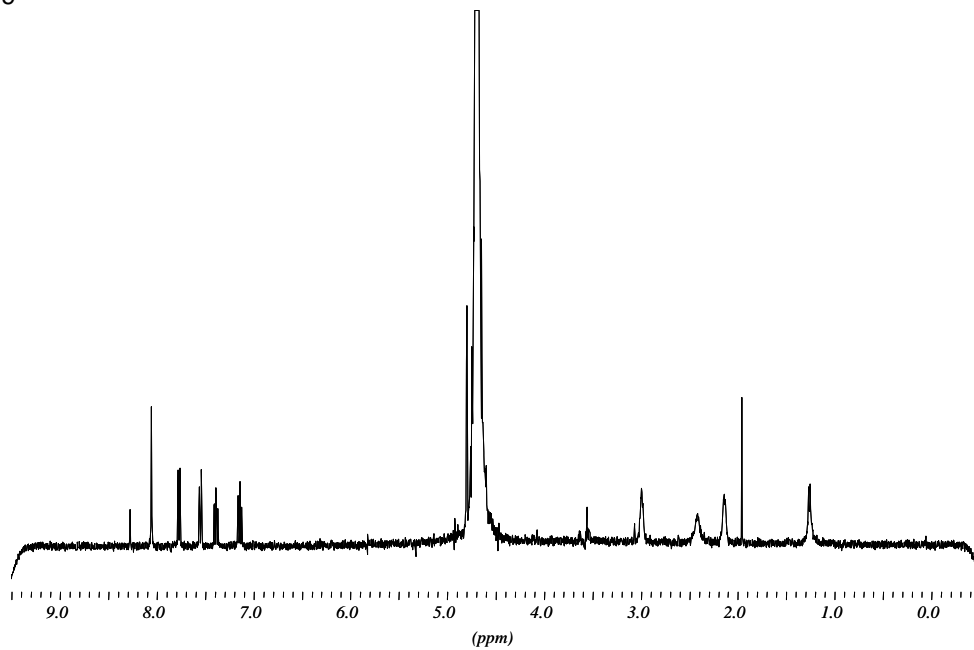

After addition of GSH and 1h reaction

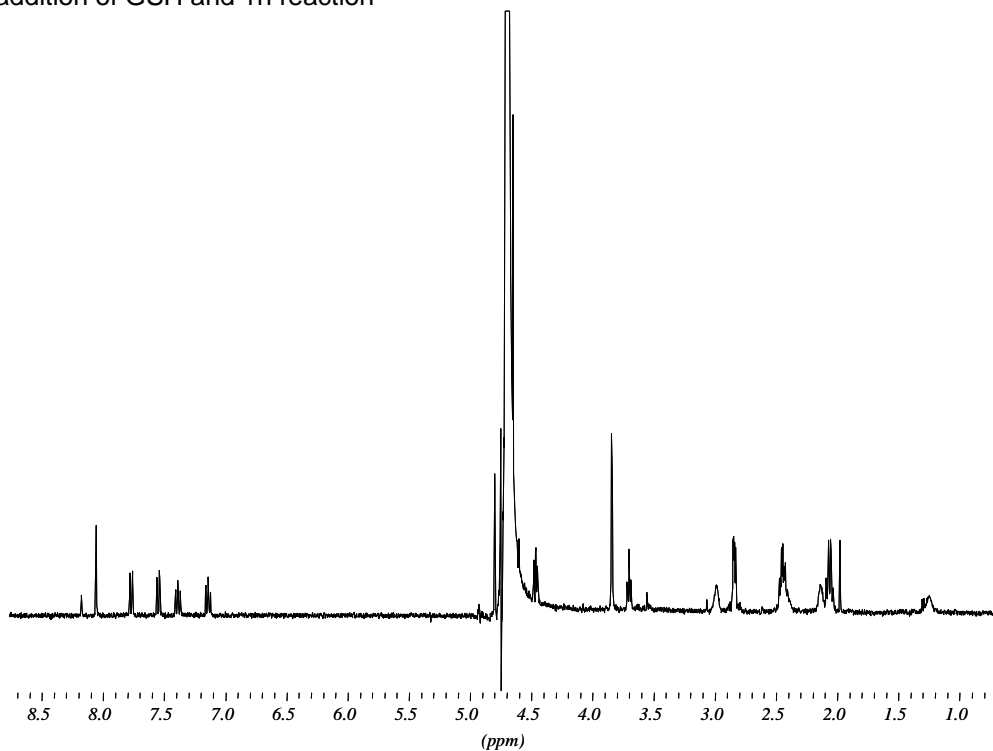

After 2.5 h of reaction

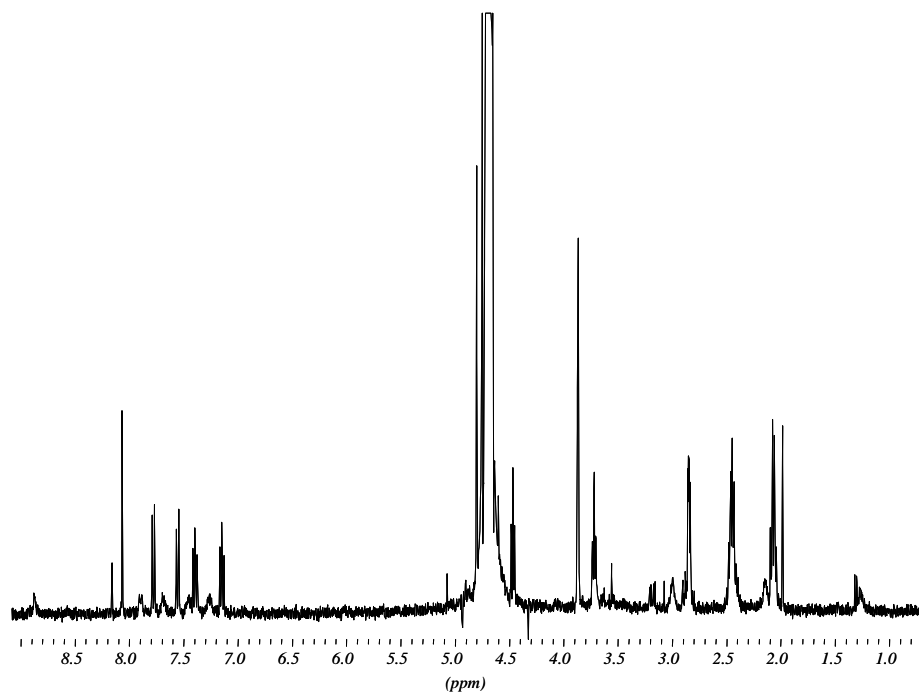

After 5 h of reaction

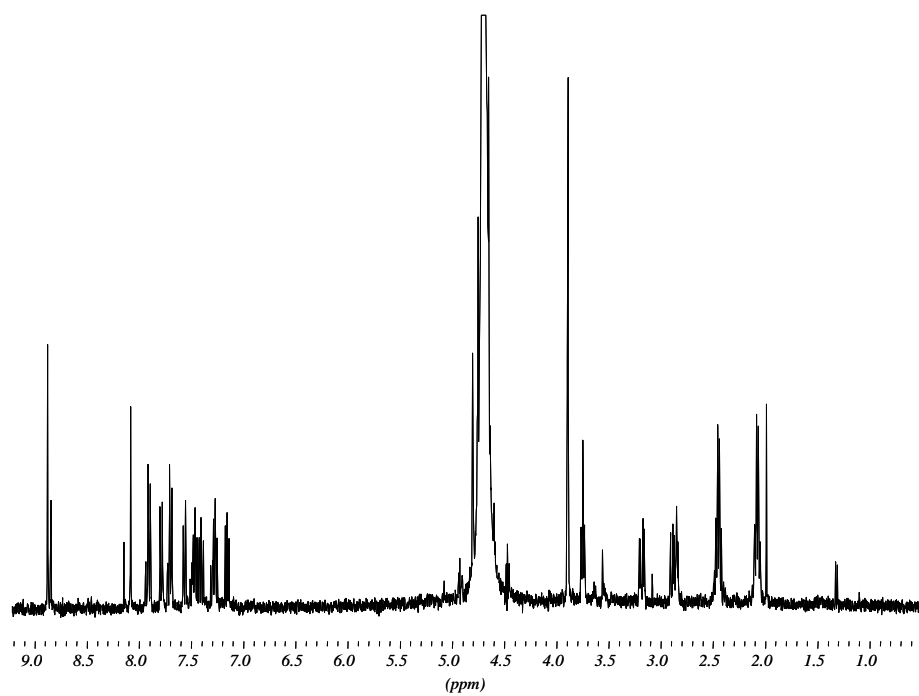

Supplement: b511792e.pdf [file b511792e.pdf]
